# Supplementary material for: mTOR Knockdown in the Infralimbic Cortex Evokes A Depressive-like State in Mouse
Source: MDPI journal article supplement (doi:10.3390/ijms22168671), 2021-08-12
Supplement: s1 [file s1]

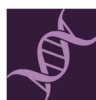

Article

# mTOR knockdown in the infralimbic cortex evokes a depressive-like state in the mouse

Emilio Garro-Martínez <sup>1,2,3,§</sup>, M. Neus Fullana <sup>1,4,5</sup>, Eva Florensa-Zanuy <sup>1,2,3</sup>, Julia Senserrich <sup>1,2,3</sup>, Verónica Paz <sup>1,4,5</sup>, Esther Ruiz-Bronchal <sup>1,4,5</sup>, Albert Adell <sup>1,2</sup>, Elena Castro <sup>1,2,3</sup>, Álvaro Díaz <sup>1,2,3</sup>, Ángel Pazos <sup>1,2,3</sup>, Analía Bortolozzi <sup>1,4,5</sup>, Fuencisla Pilar-Cuellar <sup>1,2,3,\*</sup>

## Supplementary Materials:

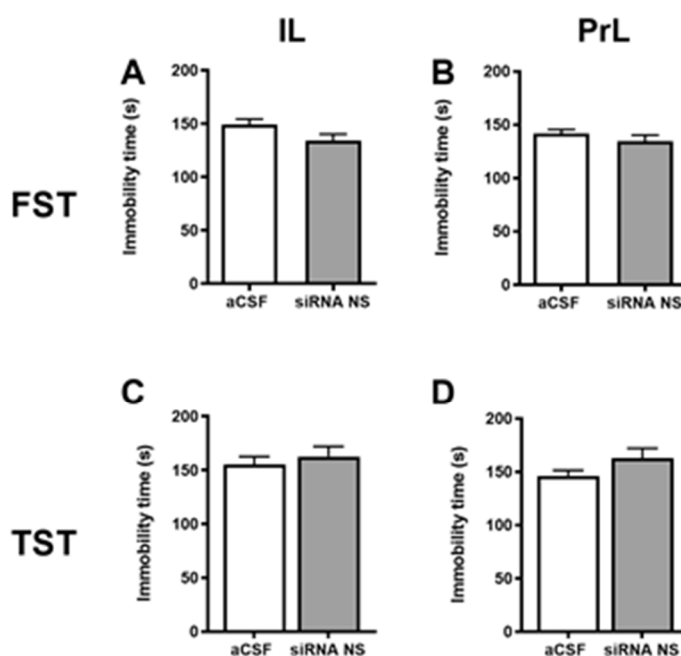

**Figure S1.** Effect of a single unilateral administration of non-sense siRNAs into the infralimbic and prelimbic cortices on depressive-like behavior. No changes were observed between animals infused in (A and C) the IL or (B and D) the PrL cortex in (A and B) the FST 24 h after acute unilateral infusion, or (C and D) the TST 48 h after infusion. Results are presented as mean±S.E.M. Student's t test. aCSF: artificial cerebrospinal fluid. n=4-6 animals per group.
